# Supplementary material for: Identification of Immune-Related Risk Signatures for the Prognostic Prediction in Oral Squamous Cell Carcinoma
Source: Hindawi journal article supplement (doi:10.1155/2021/6203759), 2021-08-25

**A**

GSE41117 (n = 42)

**Spearman's correlation = -0.35**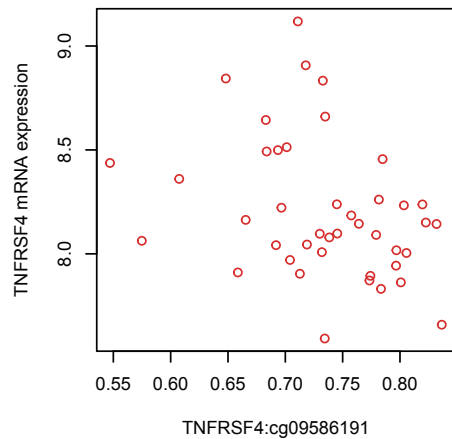**Spearman's correlation = -0.1**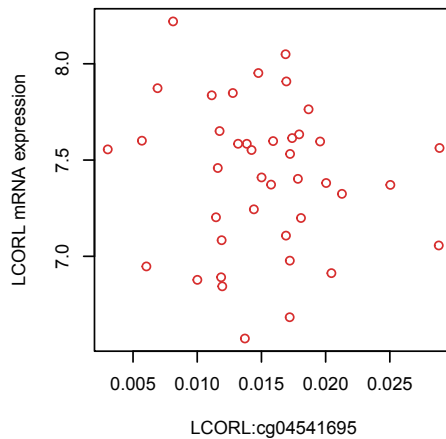**Spearman's correlation = -0.23**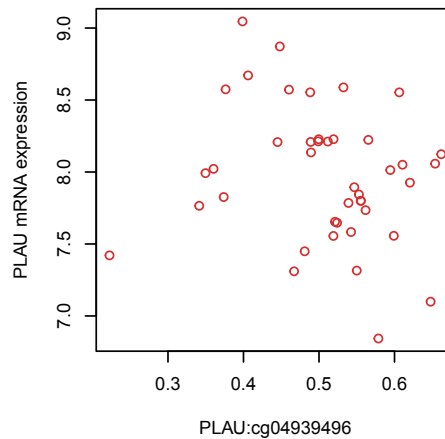**B**

GSE75539 (n = 37)

**Spearman's correlation = -0.12**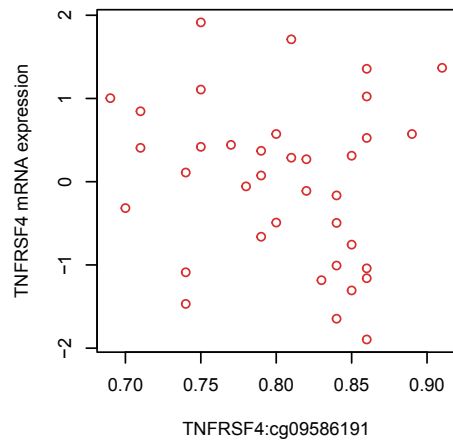**Spearman's correlation = -0.08**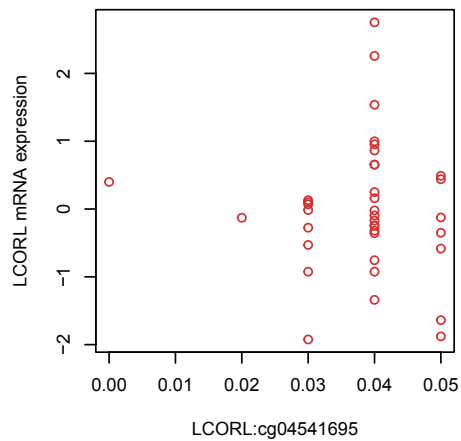**Spearman's correlation = -0.44**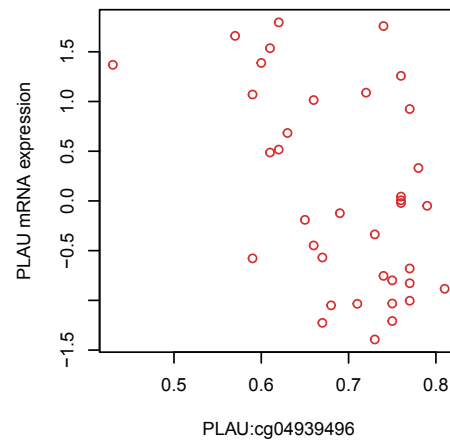

Supplement: f2 [file 6203759.f2.pdf]
